# Supplementary material for: What Do Chinese Patients Value in Orthodontic Treatment? A Discrete Choice Experiment
Source: Research Square preprint supplement (doi:10.21203/rs.3.rs-7710453/v1), 2025-10-09
Supplement: Supplementary file 1 [file 3b6f7113e88a75e49e4a7c1b.docx]

**What Do Chinese Patients Value in Orthodontic Treatment?**

**A Discrete Choice Experiment**

**ONLINE SUPPLEMENTARY FIGURES AND TABLES**


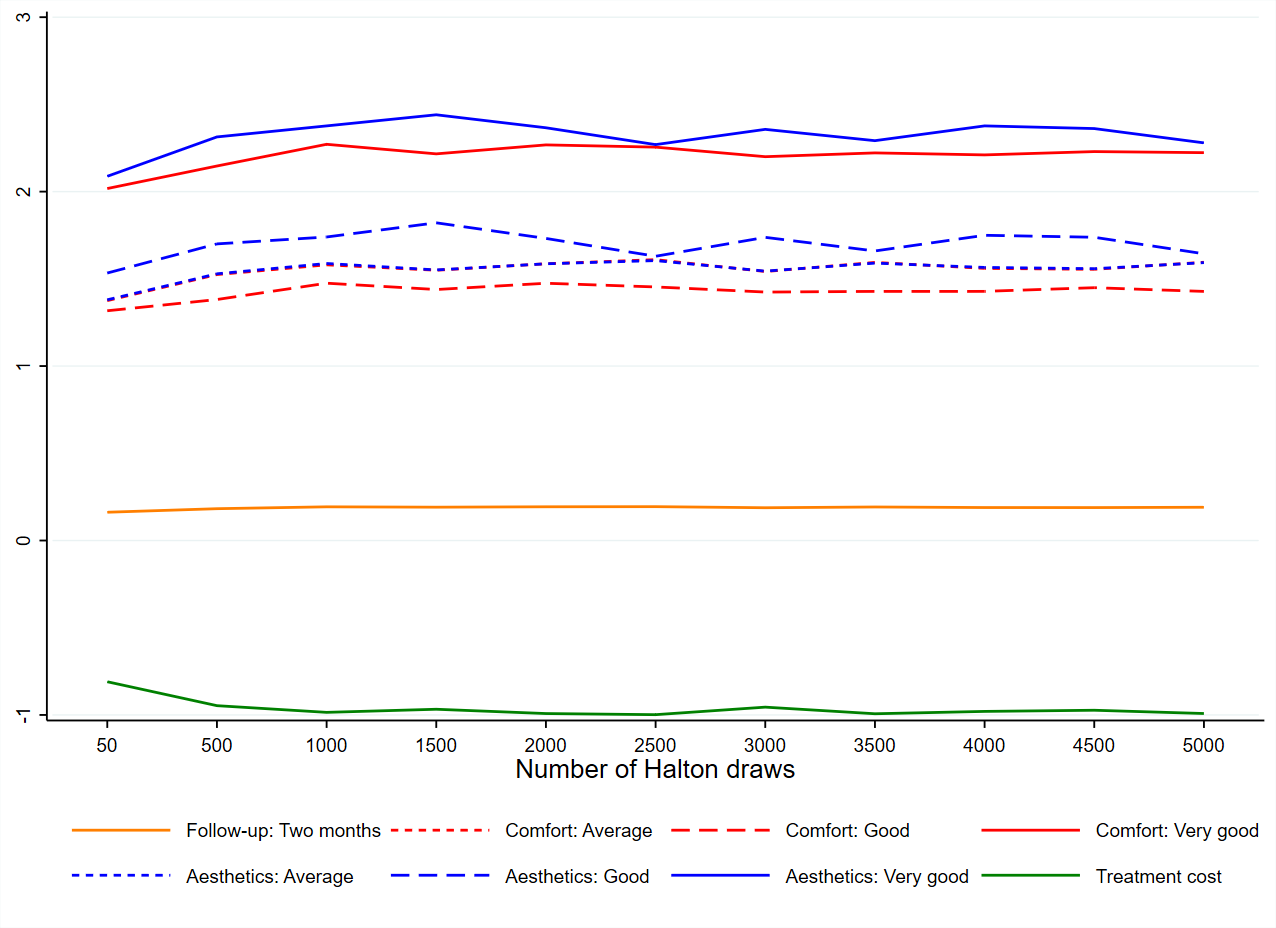


**Figure S1**. Mixed logit model, mean values of attribute parameters by the number of Halton draws


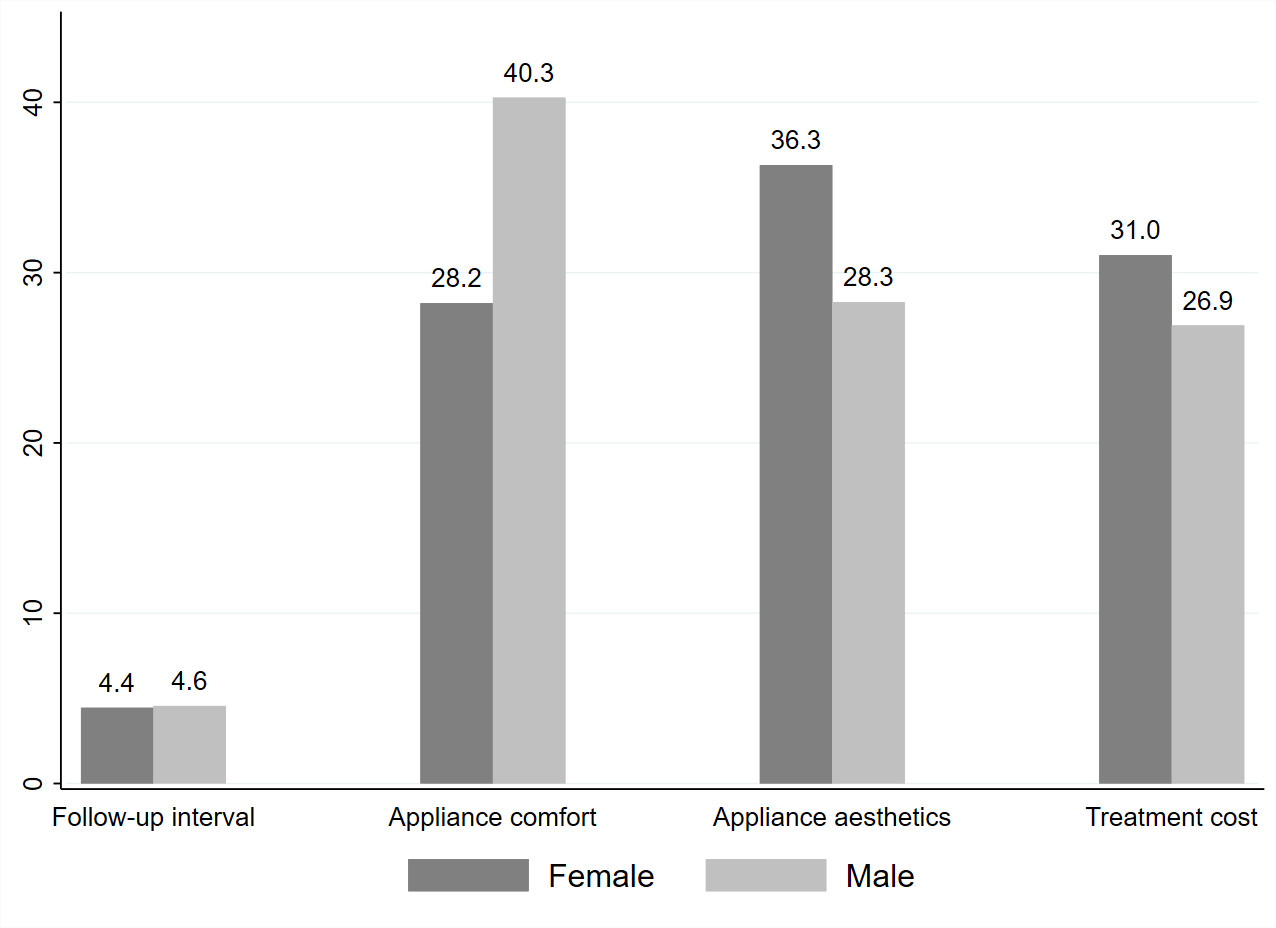


**Figure S2**. Attribute relative importance, subgroup analysis by gender

Notes: The figure displays median values constructed using the simulation method. Relative importance values in each subgroup were scaled by a common factor to ensure that their sum equals one hundred.


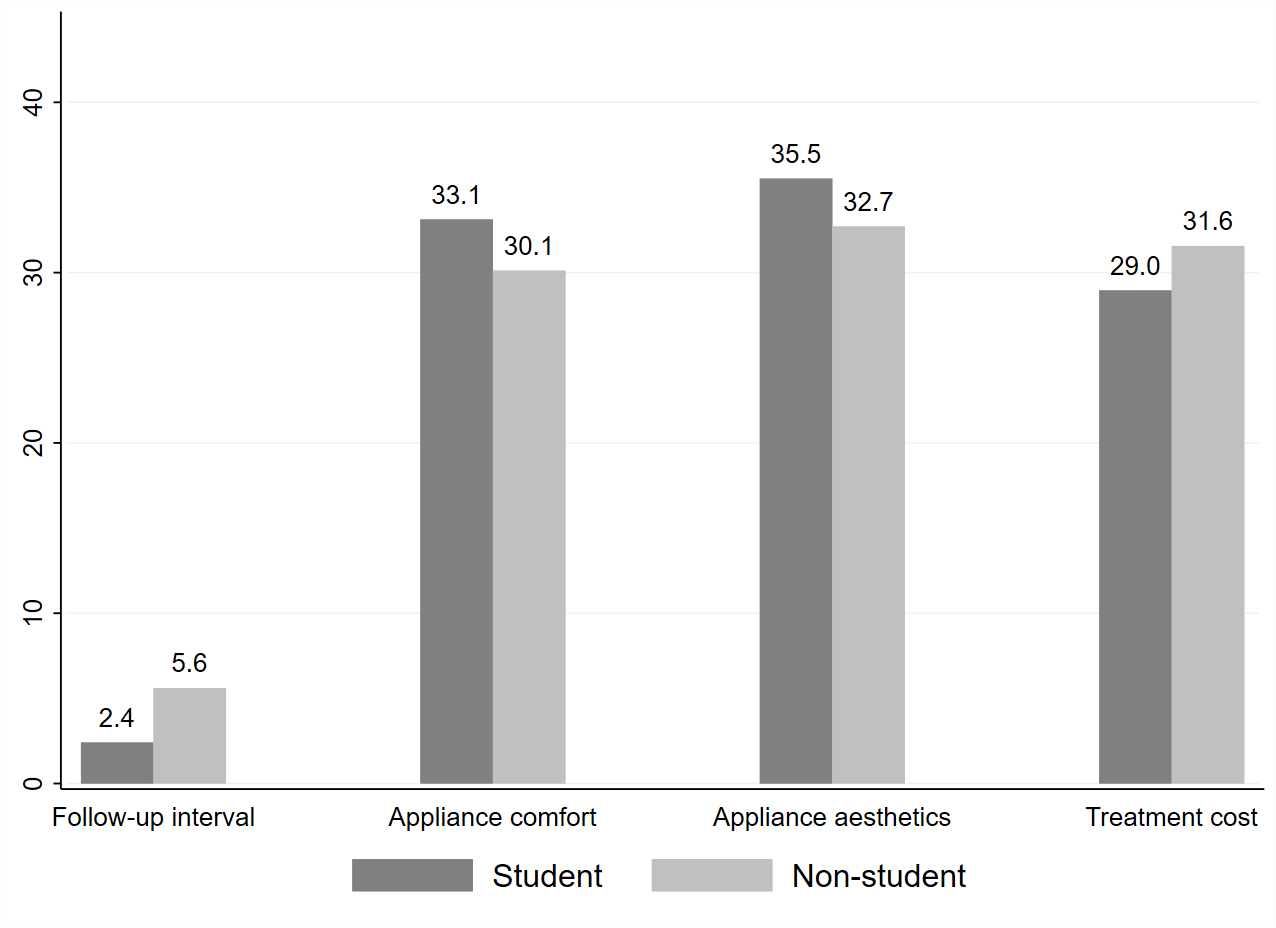


**Figure S3**. Attribute relative importance, subgroup analysis by occupation

Notes: The figure displays median values constructed using the simulation method. Relative importance values in each subgroup were scaled by a common factor to ensure that their sum equals one hundred.


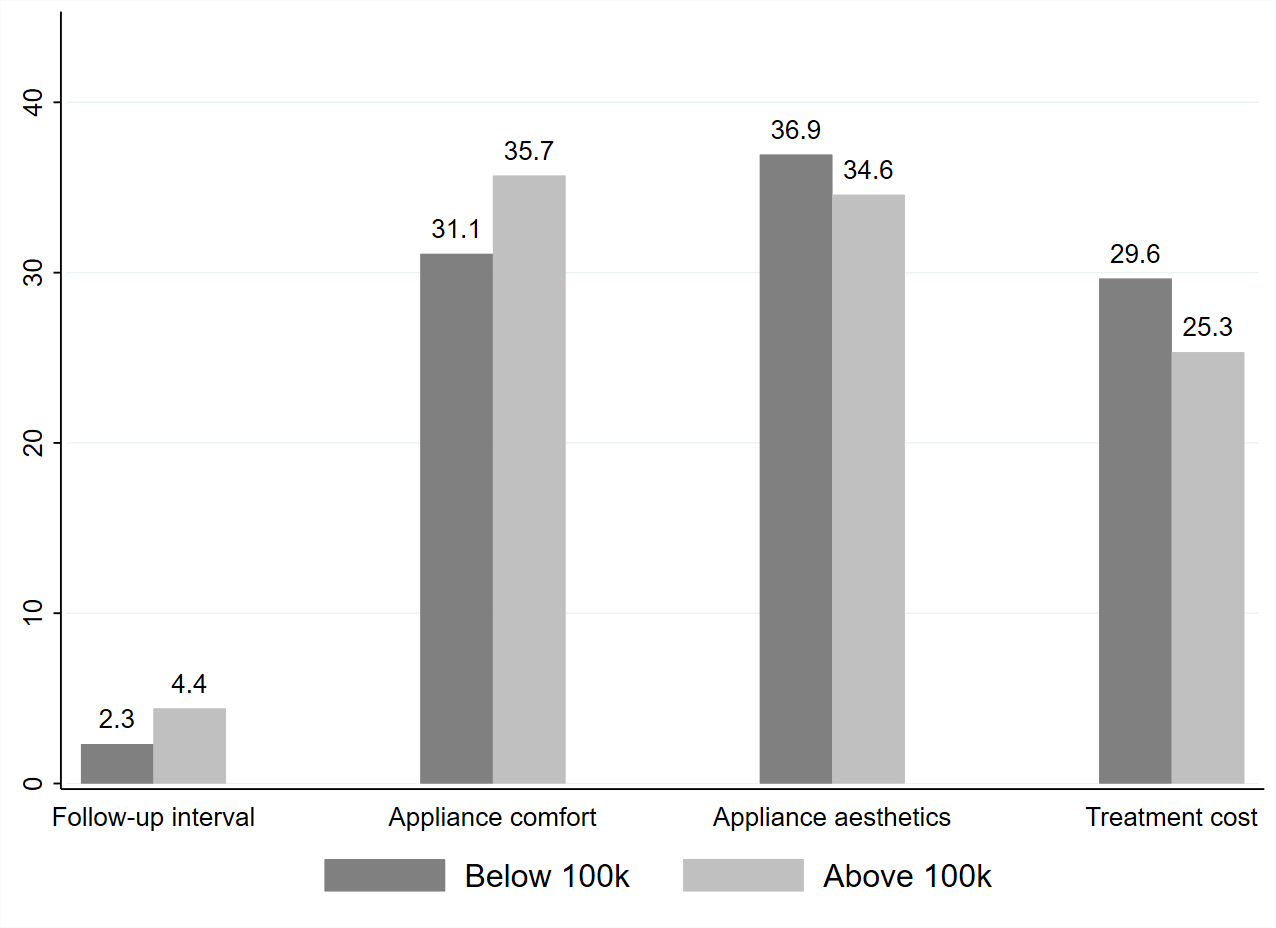


**Figure S4**. Attribute relative importance, subgroup analysis by annual household income

Notes: The figure displays median values constructed using the simulation method. Relative importance values in each subgroup were scaled by a common factor to ensure that their sum equals one hundred.


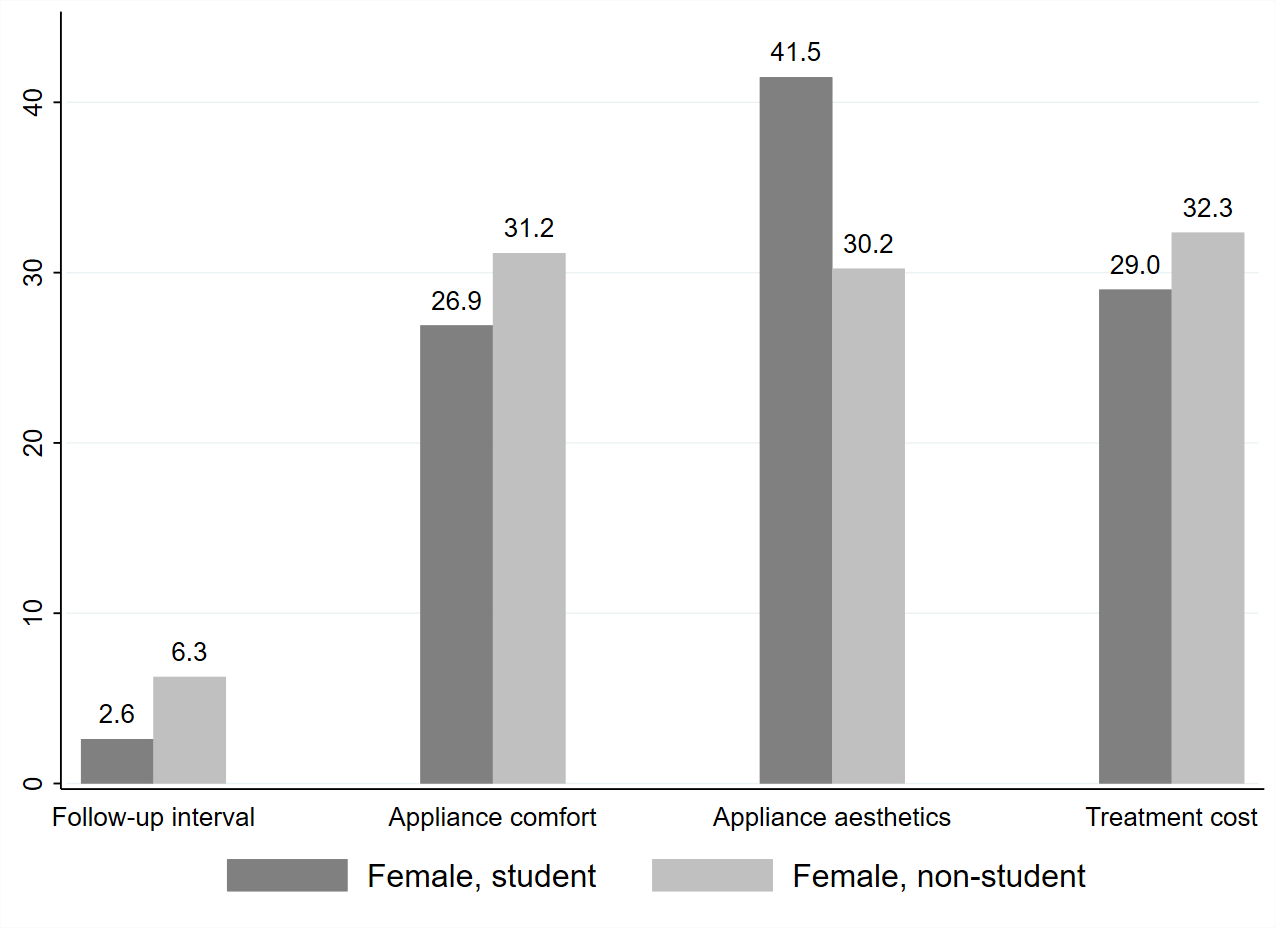


**Figure S5**. Attribute relative importance, subgroup analysis by occupation in females

Notes: The figure displays median values constructed using the simulation method. Relative importance values in each subgroup were scaled by a common factor to ensure that their sum equals one hundred.

**Table S1**. Graphic illustrations of attribute levels

| **Attribute level** | **Graphic illustration** |
| --- | --- |
| Appliance comfort: Poor |  |
| Appliance comfort: Average |  |
| Appliance comfort: Good |  |
| Appliance comfort: Very good |  |
| Appliance aesthetics: Poor |  |
| Appliance aesthetics: Average |  |
| Appliance aesthetics: Good |  |
| Appliance aesthetics: Very good |  |

**Table S2**. Mixed logit model estimation comparison

| **Halton draws** | **Max. parameter change** | **Rank of model fit** |
| --- | --- | --- |
| 500 | 17.0 | 9 |
| 1000 | 6.8 | 6 |
| 1500 | 4.7 | 5 |
| 2000 | 4.9 | 4 |
| 2500 | 5.9 | 1 |
| 3000 | 6.7 | 10 |
| 3500 | 4.5 | 3 |
| 4000 | 5.4 | 8 |
| 4500 | 1.5 | 7 |
| 5000 | 5.4 | 2 |

Notes: The second column displays the maximum absolute percentage changes in mean values of attribute parameters compared to the last estimation. The mixed logit model estimated with 500 draws was compared to the estimation result with 50 draws. Model fit ranks were consistent across log-likelihood, AIC, and BIC.

**Table S3**. Example pictures of orthodontic treatment appliances

| **Orthodontic treatment appliance** | **Example picture** |
| --- | --- |
| Metal brackets | 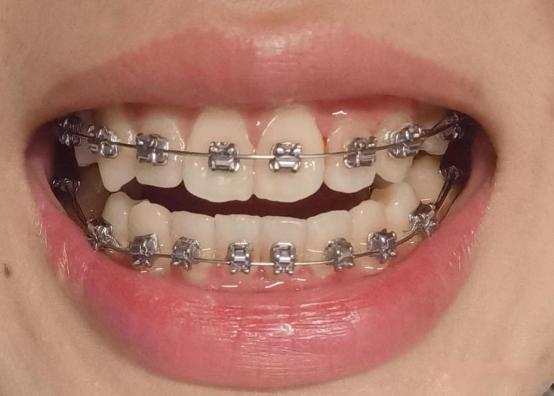 |
| Ceramic brackets | 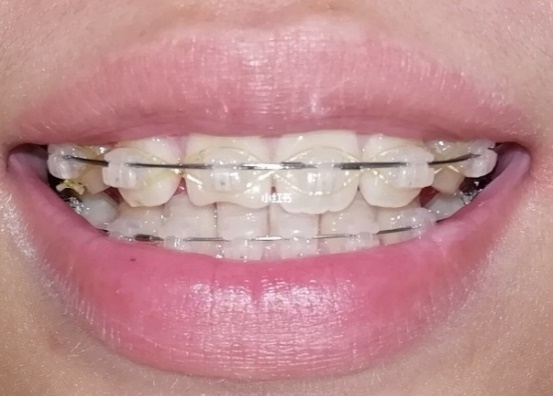 |
| Clear aligners | 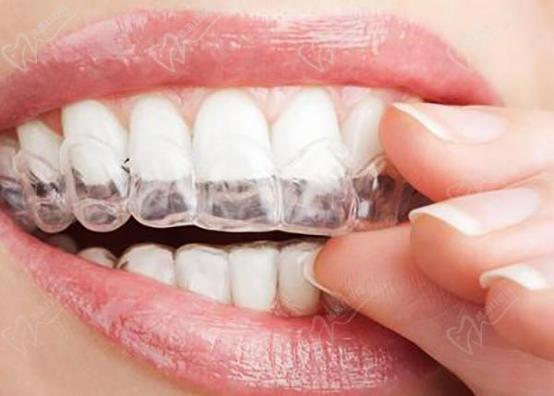 |

**Table S4**. Results of mixed logit model by gender

|  |  | **Female** | | | |  | **Male** | | | |
| --- | --- | --- | --- | --- | --- | --- | --- | --- | --- | --- |
| **Attribute** | **Levels** | **Coefficient** | **SE** | **SD** | **SE** |  | **Coefficient** | **SE** | **SD** | **SE** |
| **Constant (Neither)** |  | -14.160*** | (3.673) | 7.004*** | (1.786) |  | -9.097*** | (2.649) | 5.376*** | (1.502) |
| **Follow-up interval** | One month a |  |  |  |  |  |  |  |  |  |
|  | Two months | 0.145 | (0.087) | 0.560*** | (0.166) |  | 0.289** | (0.109) | 0.077 | (0.653) |
| **Appliance comfort** | Poor a |  |  |  |  |  |  |  |  |  |
|  | Average | 1.750*** | (0.215) | 1.280*** | (0.255) |  | 1.341*** | (0.236) | 0.851* | (0.346) |
|  | Good | 0.601 | (0.642) | 0.152 | (0.742) |  | 2.623*** | (0.791) | 0.014 | (0.475) |
|  | Very good | 1.470* | (0.657) | 0.513 | (0.322) |  | 3.311*** | (0.806) | 0.178 | (0.456) |
| **Appliance aesthetics** | Poor a |  |  |  |  |  |  |  |  |  |
|  | Average | 1.799*** | (0.207) | 1.046*** | (0.235) |  | 1.266*** | (0.220) | 0.833** | (0.300) |
|  | Good | 2.032** | (0.683) | 0.772** | (0.284) |  | 1.351 | (0.705) | 0.956** | (0.317) |
|  | Very good | 2.736*** | (0.691) | 0.244 | (0.508) |  | 1.885** | (0.709) | 0.189 | (0.577) |
| **Treatment cost (thousand CNY)** |  | -0.107*** | (0.012) | 0.089*** | (0.020) |  | -0.090*** | (0.014) | 0.071** | (0.023) |
| **Log likelihood** |  | -1021 |  |  |  |  | -493.1 |  |  |  |
| **AIC** |  | 2079 |  |  |  |  | 1022 |  |  |  |
| **BIC** |  | 2198 |  |  |  |  | 1128 |  |  |  |

Notes: AIC: Akaike information criterion. BIC: Bayesian information criterion. CNY: Chinese Yuan. SE: standard error. SD: standard deviation. a: reference level. The mixed logit models were estimated using 2,500 Halton draws to maintain consistency with the baseline analysis. * p < 0.05, ** p < 0.01, *** p < 0.001.

**Table S5**. Results of mixed logit model by occupation

|  |  | **Student** | | | |  | **Non-student** | | | |
| --- | --- | --- | --- | --- | --- | --- | --- | --- | --- | --- |
| **Attribute** | **Levels** | **Coefficient** | **SE** | **SD** | **SE** |  | **Coefficient** | **SE** | **SD** | **SE** |
| **Constant (Neither)** |  | -7.319*** | (1.492) | 3.739*** | (0.904) |  | -17.995*** | (5.229) | 8.313*** | (2.347) |
| **Follow-up interval** | One month a |  |  |  |  |  |  |  |  |  |
|  | Two months | 0.100 | (0.082) | 0.156 | (0.329) |  | 0.318** | (0.119) | 0.743*** | (0.208) |
| **Appliance comfort** | Poor a |  |  |  |  |  |  |  |  |  |
|  | Average | 1.495*** | (0.186) | 0.816** | (0.258) |  | 1.859*** | (0.308) | 1.659*** | (0.361) |
|  | Good | 1.716** | (0.571) | 0.013 | (0.300) |  | 0.718 | (0.848) | 0.646 | (0.656) |
|  | Very good | 2.439*** | (0.582) | 0.086 | (0.328) |  | 1.654 | (0.860) | 0.558 | (0.703) |
| **Appliance aesthetics** | Poor a |  |  |  |  |  |  |  |  |  |
|  | Average | 1.401*** | (0.183) | 1.049*** | (0.216) |  | 1.976*** | (0.284) | 0.900** | (0.313) |
|  | Good | 1.840** | (0.593) | 0.657** | (0.238) |  | 1.613 | (0.892) | 1.198*** | (0.308) |
|  | Very good | 2.438*** | (0.596) | 0.061 | (0.469) |  | 2.342** | (0.905) | 0.009 | (1.096) |
| **Treatment cost (thousand CNY)** |  | -0.085*** | (0.009) | 0.056*** | (0.014) |  | -0.127*** | (0.019) | 0.118*** | (0.033) |
| **Log likelihood** |  | -799.2 |  |  |  |  | -712.5 |  |  |  |
| **AIC** |  | 1634 |  |  |  |  | 1461 |  |  |  |
| **BIC** |  | 1749 |  |  |  |  | 1575 |  |  |  |

Notes: AIC: Akaike information criterion. BIC: Bayesian information criterion. CNY: Chinese Yuan. SE: standard error. SD: standard deviation. a: reference level. The mixed logit models were estimated using 2,500 Halton draws to maintain consistency with the baseline analysis. * p < 0.05, ** p < 0.01, *** p < 0.001.

**Table S6**. Results of mixed logit model by annual household income

|  |  | **Below 100k** | | | |  | **Above 100k** | | | |
| --- | --- | --- | --- | --- | --- | --- | --- | --- | --- | --- |
| **Attribute** | **Levels** | **Coefficient** | **SE** | **SD** | **SE** |  | **Coefficient** | **SE** | **SD** | **SE** |
| **Constant (Neither)** |  | -16.842* | (7.669) | 9.615* | (3.985) |  | -17.842* | (8.636) | 7.385* | (3.587) |
| **Follow-up interval** | One month a |  |  |  |  |  |  |  |  |  |
|  | Two months | 0.106 | (0.140) | 0.271 | (0.458) |  | 0.282* | (0.116) | 0.650** | (0.201) |
| **Appliance comfort** | Poor a |  |  |  |  |  |  |  |  |  |
|  | Average | 1.665*** | (0.339) | 0.806 | (0.530) |  | 1.960*** | (0.303) | 1.389*** | (0.326) |
|  | Good | 2.300* | (1.089) | 0.125 | (0.569) |  | 2.193 | (1.853) | 0.289 | (1.025) |
|  | Very good | 3.463** | (1.138) | 0.274 | (0.623) |  | 3.012 | (1.856) | 0.915* | (0.369) |
| **Appliance aesthetics** | Poor a |  |  |  |  |  |  |  |  |  |
|  | Average | 1.959*** | (0.375) | 1.273*** | (0.380) |  | 1.886*** | (0.267) | 0.896** | (0.307) |
|  | Good | 2.700* | (1.107) | 0.289 | (0.881) |  | 2.770 | (1.426) | 0.450 | (0.859) |
|  | Very good | 3.808*** | (1.136) | 0.990* | (0.470) |  | 3.212* | (1.441) | 0.826 | (0.510) |
| **Treatment cost (thousand CNY)** |  | -0.127*** | (0.022) | 0.086** | (0.029) |  | -0.110*** | (0.016) | 0.091*** | (0.026) |
| **Log likelihood** |  | -367.7 |  |  |  |  | -635.5 |  |  |  |
| **AIC** |  | 771.4 |  |  |  |  | 1307 |  |  |  |
| **BIC** |  | 873.6 |  |  |  |  | 1419 |  |  |  |

Notes: AIC: Akaike information criterion. BIC: Bayesian information criterion. CNY: Chinese Yuan. SE: standard error. SD: standard deviation. a: reference level. The mixed logit models were estimated using 2,500 Halton draws to maintain consistency with the baseline analysis. * p < 0.05, ** p < 0.01, *** p < 0.001.

**Table S7**. Results of mixed logit model by occupation in females

|  |  | **Female, student** | | | |  | **Female, non-student** | | | |
| --- | --- | --- | --- | --- | --- | --- | --- | --- | --- | --- |
| **Attribute** | **Levels** | **Coefficient** | **SE** | **SD** | **SE** |  | **Coefficient** | **SE** | **SD** | **SE** |
| **Constant (Neither)** |  | -8.084** | (2.608) | 3.769* | (1.484) |  | -16.524*** | (4.597) | 5.721*** | (1.535) |
| **Follow-up interval** | One month a |  |  |  |  |  |  |  |  |  |
|  | Two months | 0.041 | (0.110) | 0.250 | (0.387) |  | 0.261 | (0.155) | 1.002*** | (0.294) |
| **Appliance comfort** | Poor a |  |  |  |  |  |  |  |  |  |
|  | Average | 1.641*** | (0.255) | 0.728* | (0.356) |  | 2.140*** | (0.441) | 2.002*** | (0.467) |
|  | Good | 0.716 | (0.833) | 0.016 | (0.376) |  | -0.141 | (1.022) | 0.886 | (0.643) |
|  | Very good | 1.532 | (0.842) | 0.038 | (0.395) |  | 0.911 | (1.027) | 0.674 | (0.882) |
| **Appliance aesthetics** | Poor a |  |  |  |  |  |  |  |  |  |
|  | Average | 1.549*** | (0.258) | 1.252*** | (0.292) |  | 2.327*** | (0.415) | 0.875* | (0.426) |
|  | Good | 2.299* | (1.002) | 0.226 | (0.528) |  | 1.515 | (1.020) | 1.245** | (0.429) |
|  | Very good | 2.975** | (1.006) | 0.405 | (0.428) |  | 2.334* | (1.031) | 0.493 | (0.677) |
| **Treatment cost (thousand CNY)** |  | -0.087*** | (0.013) | 0.059** | (0.020) |  | -0.144*** | (0.027) | 0.127*** | (0.038) |
| **Log likelihood** |  | -456.4 |  |  |  |  | -554 |  |  |  |
| **AIC** |  | 948.7 |  |  |  |  | 1144 |  |  |  |
| **BIC** |  | 1054 |  |  |  |  | 1253 |  |  |  |

Notes: AIC: Akaike information criterion. BIC: Bayesian information criterion. CNY: Chinese Yuan. SE: standard error. SD: standard deviation. a: reference level. The mixed logit models were estimated using 2,500 Halton draws to maintain consistency with the baseline analysis. * p < 0.05, ** p < 0.01, *** p < 0.001.

**Table S8**. Checklist for reporting discrete choice experiments in health

| **Section Item** | | **Page and paragraph** |
| --- | --- | --- |
| **Purpose and rationale** |  |  |
| **1** | Describe the real-world context and decision-maker that the hypothetical choice context seeks to replicate or inform | Page 4, line 1-31 |
| **2** | Provide a rationale for using a DCE to answer the research question | Page 5, line 32-39 |
| **Attributes and levels** |  |  |
| **3** | Describe how attributes and levels were derived (e.g. literature review, interviews, focus groups, expert input) | Page 5-6, line 49-63 |
| **4** | Provide the final list of attributes and levels | Page 6, line 60-63  Table 1 |
| **Experimental design** |  |  |
| **5** | Report the number of alternatives per choice set and whether they were labelled or unlabelled | Page 6, line 66-68 |
| **6** | Describe response options (e.g. forced choice, opt-out, status quo) | Page 6, line 66-69 |
| **7** | Describe the type of experimental design (e.g. orthogonal, D-efficient, Bayesian efficient, partial profile) | Page 6, line 65-66 |
| **8** | Describe which effects are identified in the design (e.g. main effects, higher order interactions, functional form) | Page 9, line 135-142 |
| **9** | Describe the number of choice sets, blocks and choice sets per block |  |
| **10** | Indicate how the experimental design was obtained (software, catalogue, other) | Page 6, line 65-66 |
| **Survey design** |  |  |
| **11** | Provide a sample choice set and the instructions and background information given to respondents (e.g. providing the survey as an appendix) | Page 6, Table 2 |
| **12** | Report any randomisation (e.g. choice set order, attribute order, alternative order, framing effects) |  |
| **13** | Describe what was checked in piloting (e.g. understanding, respondent burden, timing, wording) | Page 7, line 83-87 |
| **14** | Report whether information from the pilot was used to update the experimental design (e.g. priors, functional form of attributes) or survey design | Page 7, line 88-91 |
| **Sample and data collection** |  |  |
| **15** | Report respondent inclusion/exclusion criteria | Page 7, line 104-105 |
| **16** | Describe how data were collected (e.g. mail, personal interview, web survey) | Page 7, line 93-105 |
| **17** | Report the response rate or cooperation rate, if possible | Page 12, line 213-215 |
| **18** | Report the final sample size and how the sample size was determined | Page 8, line 106-114 |
| **19** | Describe respondent characteristics and representativeness of target population, if known | Page 12, line 215-222 |
| **Econometric analysis** |  |  |
| **20** | Indicate coding of data (e.g. effects, dummy, continuous) including definitions | Page 8, line 117-118 |
| **21** | Report whether any respondents were removed and why (e.g. suspected fraudulent responses, rationality tests) | Page 12, line 213-214 |
| **22** | Provide the rationale for model choice (e.g. conditional logit, mixed logit, latent class) and assumptions (e.g. error variance) | Page 9, line 135-142 |
| **23** | Report model specification | Page 9, line 136-142 |
| **Reporting of results** |  |  |
| **24** | Report the model performance, goodness of ft (if comparing models) | Page 9, line 136-142 |
| **25** | Describe methods used for analysis of model results (e.g. calculation of marginal rate of substitution, attribute relative importance, welfare gain) | Page 9-12, line 143-210 |
| **26** | Report measures of precision for the output(s) of interest (e.g. confidence intervals) and how these were derived | Table 4, Table 5 |
